# Supplementary material for: Edible Seaweeds Extracts: Characterization and Functional Properties for Health Conditions
Source: MDPI journal article supplement (doi:10.3390/antiox12030684), 2023-03-10
Supplement: s1 [file s1]

**Supplementary Materials:**

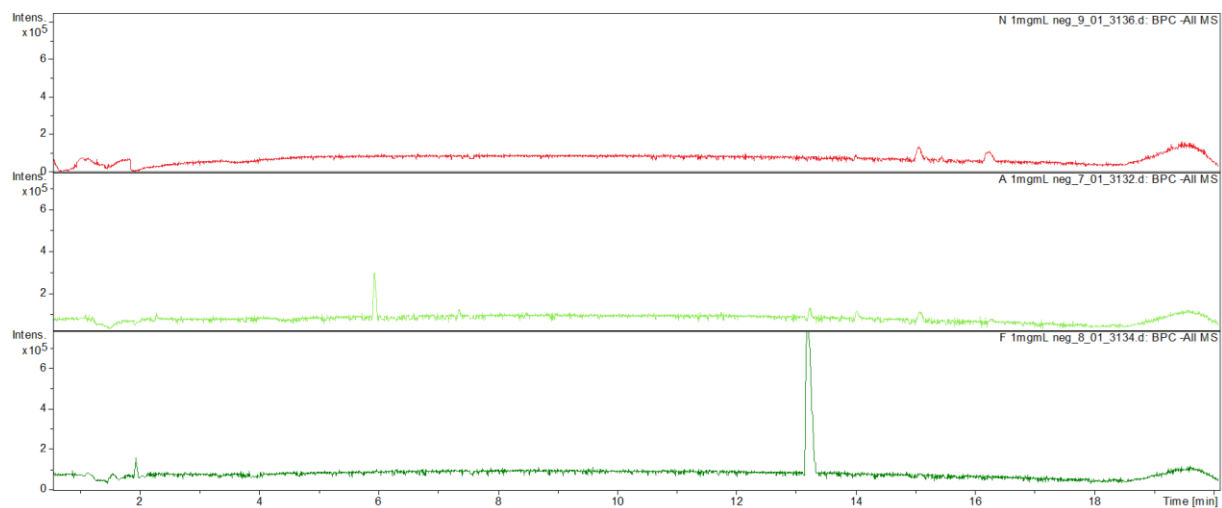

**Figure S1** - Chromatographic profiles of the compounds in the three extracts, Nori (N), Aramé (A) and Fucus (F) obtained by using LC/HRMS-MS in ESI negative mode. Extracts at 1 mg dry mass/mL.
